# Supplementary material for: Predicting the climate impact of aviation for en-route emissions: the algorithmic climate change function submodel ACCF 1.0 of EMAC 2.53
Source: Copernicus journal article supplement (doi:10.5194/gmd-16-3313-2023), 2023-06-13
Supplement: Supplementary file 1 [file gmd-16-3313-2023-supplement.zip]

Archive with 3 entries (3 files):
- Supplement_contrail aCCF development_updated.pdf
- Supplement_user manual_ACCF_revised.pdf
- gmd-16-3313-2023-supplement-title-page.pdf
