# Supplementary material for: Predicting the climate impact of aviation for en-route emissions: the algorithmic climate change function submodel ACCF 1.0 of EMAC 2.53
Source: Copernicus journal article supplement (doi:10.5194/gmd-16-3313-2023), 2023-06-13
Supplement: Supplementary file 1 [file gmd-16-3313-2023-supplement.zip › gmd-16-3313-2023-supplement-title-page.pdf]

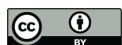

## *Supplement of*

# **Predicting the climate impact of aviation for en-route emissions: the algorithmic climate change function submodel ACCF 1.0 of EMAC 2.53**

**Feijia Yin et al.**

*Correspondence to:* Feijia Yin (f.yin@tudelft.nl)

- gmd-16-3313-2023-supplement-title-page.pdf
- Supplement\_contrail aCCF development\_updated.pdf
- Supplement\_user manual\_ACCF\_revised.pdf

The copyright of individual parts of the supplement might differ from the article licence.
